# Supplementary material for: Structure–Activity Relationship Studies of Substitutions of Cationic Amino Acid Residues on Antimicrobial Peptides
Source: MDPI journal article supplement (doi:10.3390/antibiotics12010019), 2022-12-23

## Supporting Information

### **Structure-activity relationship studies of substitutions of cationic amino acid residues on antimicrobial peptides**

Mayu Takada<sup>1</sup>, Takahito Ito<sup>1,2</sup>, Megumi Kurashima<sup>1</sup>, Natsumi Matsunaga<sup>1</sup>, Yosuke Demizu<sup>1,2\*</sup> and Takashi Misawa<sup>1,\*</sup>

<sup>1</sup>National Institute of Health Sciences, 3-25-26, Tonomachi, Kawasaki-ku, Kawasaki-shi, Kanagawa 210-9501 Japan.

<sup>2</sup>Graduate School of Medical Life Science, Yokohama City University, 1-7-29 Yokohama, Kanagawa 230-0045, Japan.

\*Correspondence: misawa@nihs.go.jp (T. M.), demizu@nihs.go.jp (Y. D.); Tel.: +81-44-270-6580

## Table of contents

|                                |      |
|--------------------------------|------|
| • HPLC analytical method       | P3   |
| • Characterization of peptides | P4-8 |

## HPLC analytical method

|            |                                                                   |                                                                          |
|------------|-------------------------------------------------------------------|--------------------------------------------------------------------------|
| Column     | : Preparative column                                              | XBridge BEH C18 OBD Prep Column 5 $\mu$ m<br>19 $\times$ 250 mm (Waters) |
|            | Analysis column                                                   | Inertsil WP300 C18 5 $\mu$ M 150 $\times$ 3.0 mm<br>(GL Sciences)        |
| Conditions | : solvent A 0.1% TFA/water, solvent B 0.1% TFA/CH <sub>3</sub> CN |                                                                          |
| Flow rate  | : preparation                                                     | 10 mL/min                                                                |
|            | Analysis                                                          | 1.0 mL/min                                                               |
| Gradient   | : 10–90% gradient of solvent B                                    | 30 min                                                                   |

## Pep 1

H-Gly-Lys-Lys-Phe-Leu-Lys-Ser-Aib-Lys-Lys-Phe-Val-Lys-Aib-Phe-Lys-NH<sub>2</sub>

Purity : 99.9%

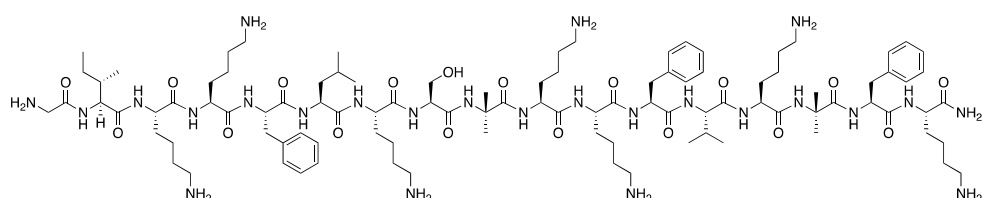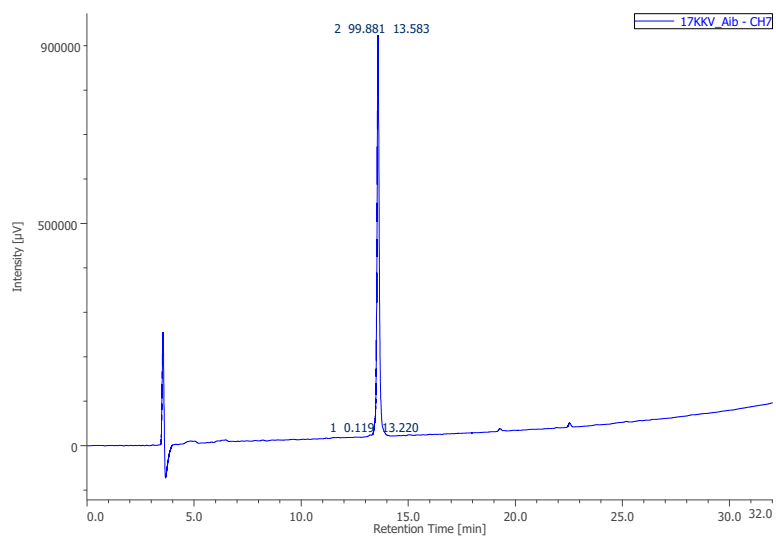

LC-MS (ESI<sup>+</sup>) calcd for C<sub>99</sub>H<sub>167</sub>N<sub>25</sub>O<sub>18</sub>[M+5H]<sup>5+</sup> : 399.85842, found: 399.8256.

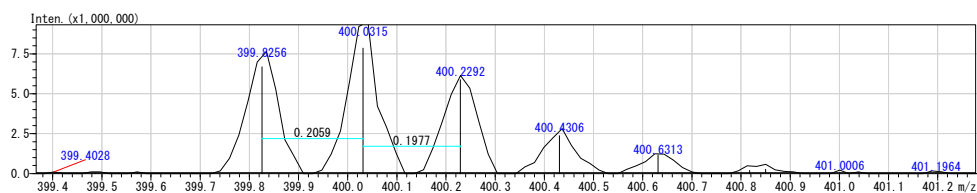

## Pep 2

H-Gly-Orn-Orn-Phe-Leu-Orn-Ser-Aib-Orn-Orn-Phe-Val-Orn-Aib-Phe-Orn-NH<sub>2</sub>

Purity : 95.5%

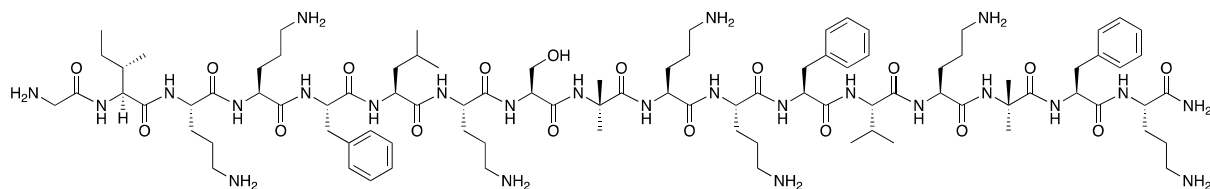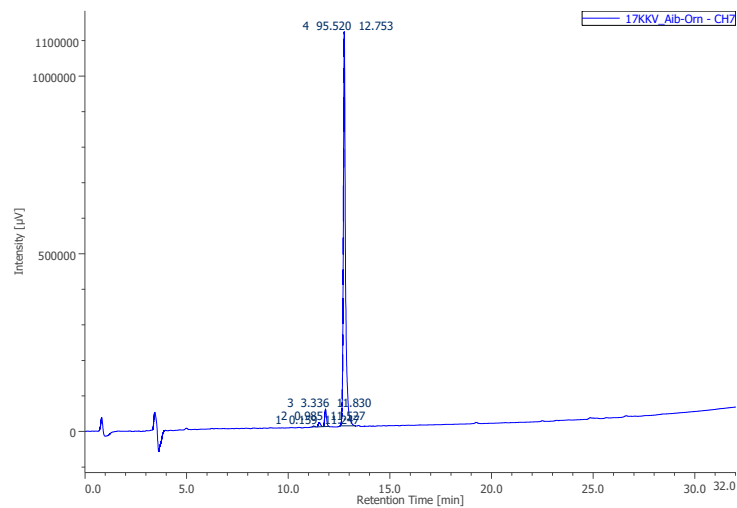

LC-MS (ESI<sup>+</sup>) calcd for C<sub>92</sub>H<sub>153</sub>N<sub>25</sub>O<sub>18</sub>[M+5H]<sup>5+</sup> : 380.2365, found: 380.2077.

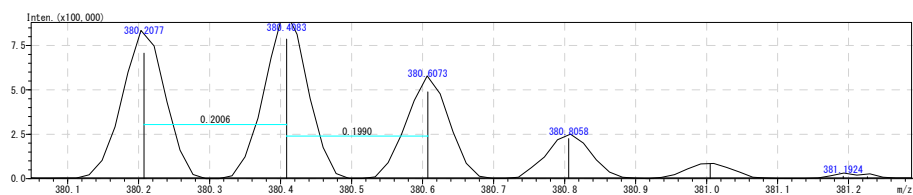

### Pep 3

H-Gly-Dab-Dab-Phe-Leu-Dab-Ser-Aib-Dab-Dab-Phe-Val-Dab-Aib-Phe-Dab-NH<sub>2</sub>

Purity : 100.0%

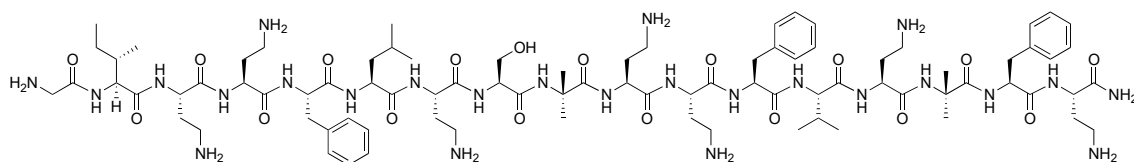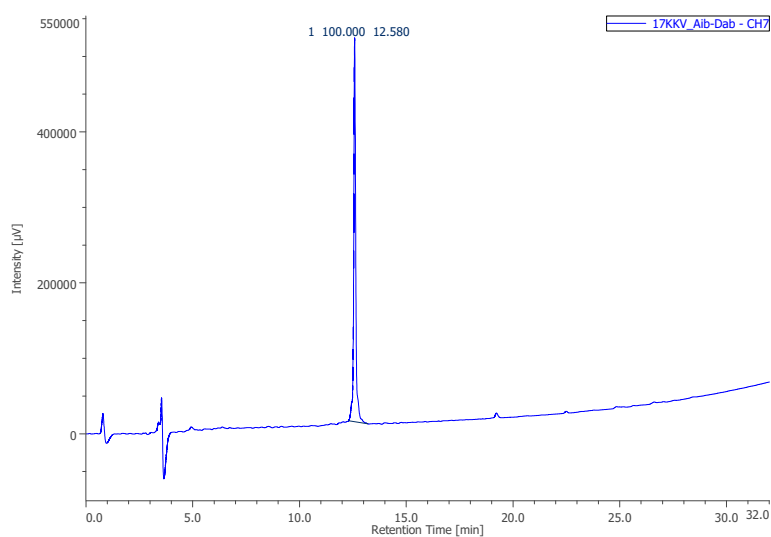

LC-MS (ESI<sup>+</sup>) calcd for C<sub>85</sub>H<sub>139</sub>N<sub>25</sub>O<sub>18</sub>[M+5H]<sup>5+</sup> : 360.6146, found: 360.5883.

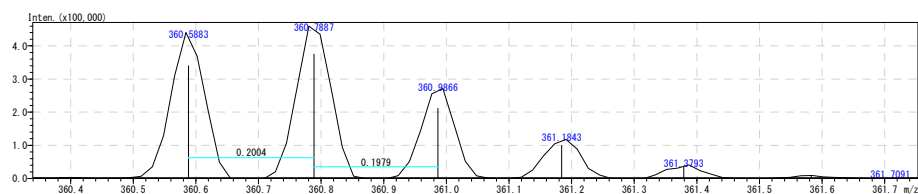

# **Pep 4**

H-Gly-Arg-Arg-Phe-Leu-Arg-Ser-Aib-Arg-Arg-Phe-Val-Arg-Aib-Phe-Arg-NH<sub>2</sub>

Purity : 98.2%

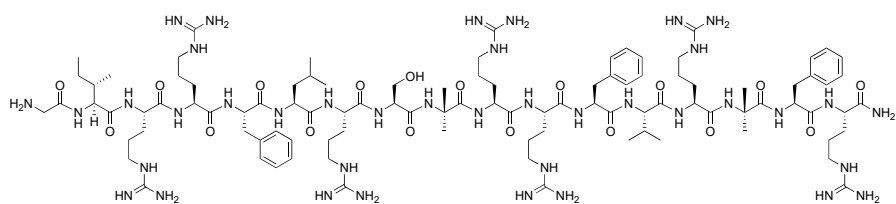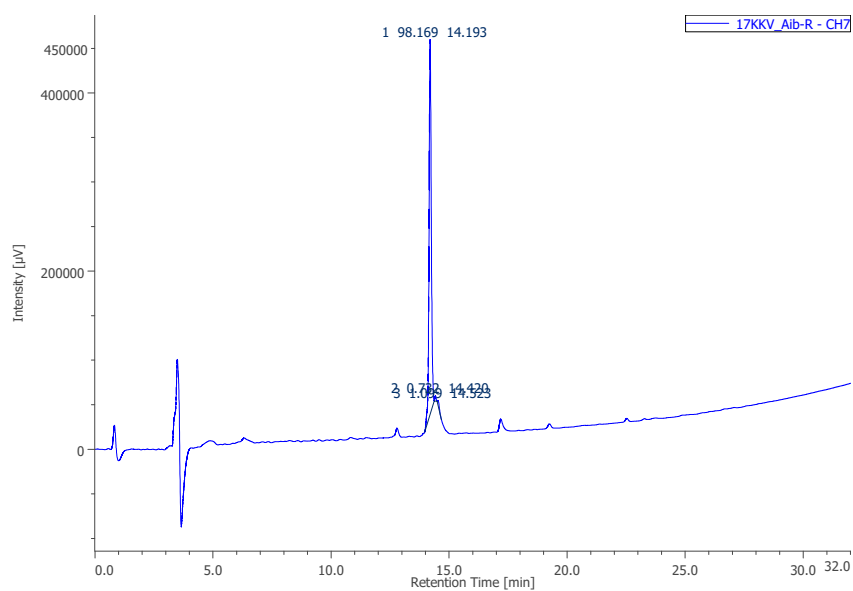

LC-MS (ESI<sup>+</sup>) calcd for C<sub>99</sub>H<sub>167</sub>N<sub>39</sub>O<sub>18</sub>[M+5H]<sup>5+</sup> : 439.06702, found: 439.0331.

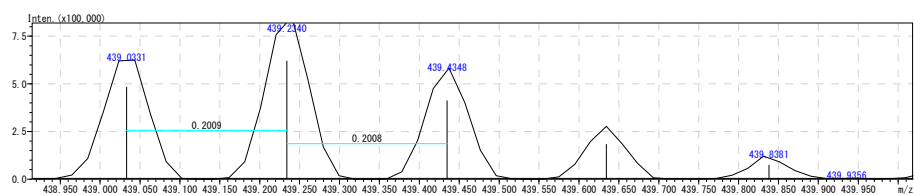

## Pep 5

H-Gly-His-His-Phe-Leu-His-Ser-Aib-His-His-Phe-Val-His-Aib-Phe-His-NH<sub>2</sub>

Purity : 78.2%

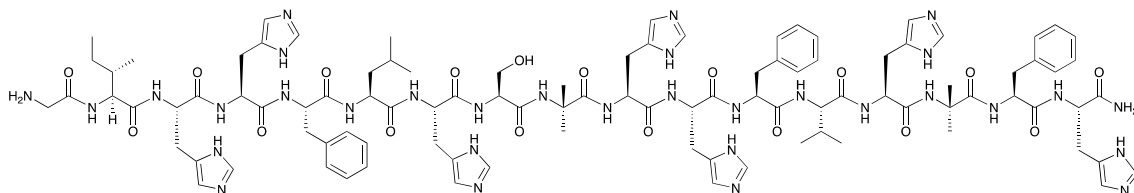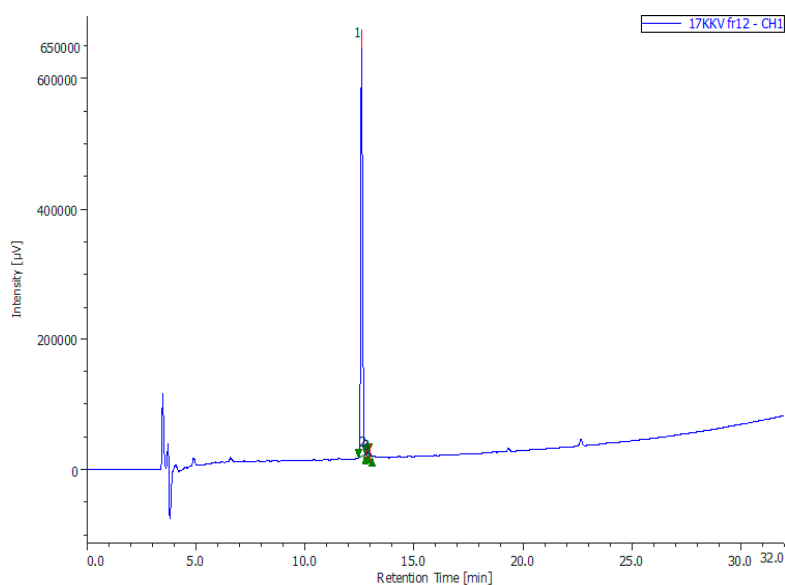



LC-MS (ESI<sup>+</sup>) calcd for C<sub>99</sub>H<sub>132</sub>N<sub>32</sub>O<sub>18</sub>[M+5H]<sup>5+</sup> : 412.40794, found: 412.3769.

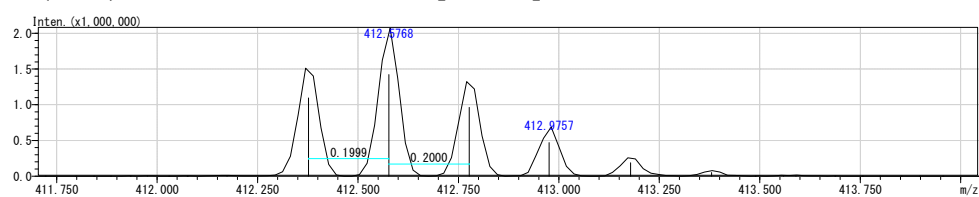

Supplement: s1 [file s1]
